# Supplementary material for: TNFR2 Promotes Glycolysis to Induce PD-1 Expression Imbalance Between Effector T Cells and Tregs and Confers Immunotherapy Resistance in Cervical Cancer
Source: Research Square preprint supplement (doi:10.21203/rs.3.rs-8795648/v1), 2026-02-23
Supplement: Supplementary file 2 [file 68310519e0a2c268b44729b1.docx]

**TNFR2 Promotes Glycolysis to Induce PD-1 Expression Imbalance Between Effector T Cells and Tregs and Confers Immunotherapy Resistance in Cervical Cancer**

**Author name**

Qingqing Liu1,2*, Jinwen Ye1,2*, Yiping Hao1,2*, Chuanying Zhao1,2, Wenhao Shi1,2, Bingyu Wang1,2, Wenjing Zhang1, Xinlin Jiao1, Baoxia Cui1#, Teng Zhang1#

* These authors are co-first authors.

#These authors contributed equally to this work.

**Corresponding Author**

Baoxia Cui, Department of Obstetrics and Gynecology, Qilu Hospital of Shandong University, No.107 Wenhua West Road, Jinan City 250012, Shandong Province, China.

Email: cuibaoxia@sdu.edu.cn

Teng Zhang, Department of Obstetrics and Gynecology, Qilu Hospital of Shandong University, No.107 Wenhua West Road, Jinan City 250012, Shandong Province, China.

Email: 402711821@qq.com

**Author affiliations**

1. Department of Obstetrics and Gynecology, Qilu Hospital of Shandong University, No.107 Wenhua West Road, Jinan City 250012, Shandong Province, China.
2. Shandong Key Laboratory of Reproductive Health and Birth Defects Prevention and Control

**SUPPORTING INFORMATION:**

Figure S1: Sanger sequencing electropherogram confirming sgRNA cleavage activity

Figure S2: Gating strategy and compensation controls for flow cytometric analysis of peripheral blood and tumor-infiltrating lymphocytes. This panel illustrates the sequential gating strategy used to identify and analyze T cell subsets.

Figure S3: TNFR2 overexpression enhances cervical cancer cell proliferation, migration, invasion and inhibits apoptosis in vitro.

Figure S4: TNFR2 overexpression enhances glycolysis in cervical cancer cells.

Original data：The original data of the western blot.


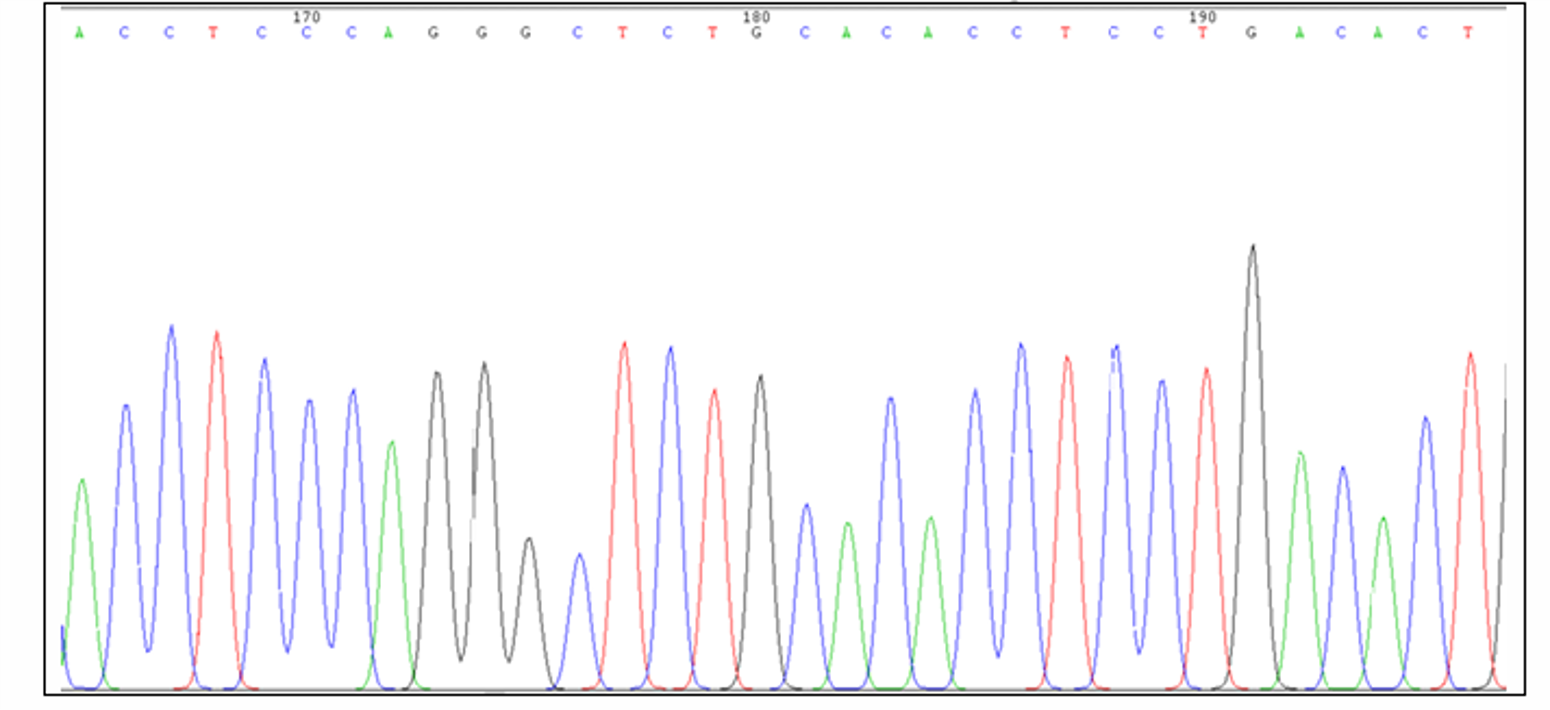


**Figure S1: Sanger sequencing electropherogram confirming sgRNA cleavage activity**


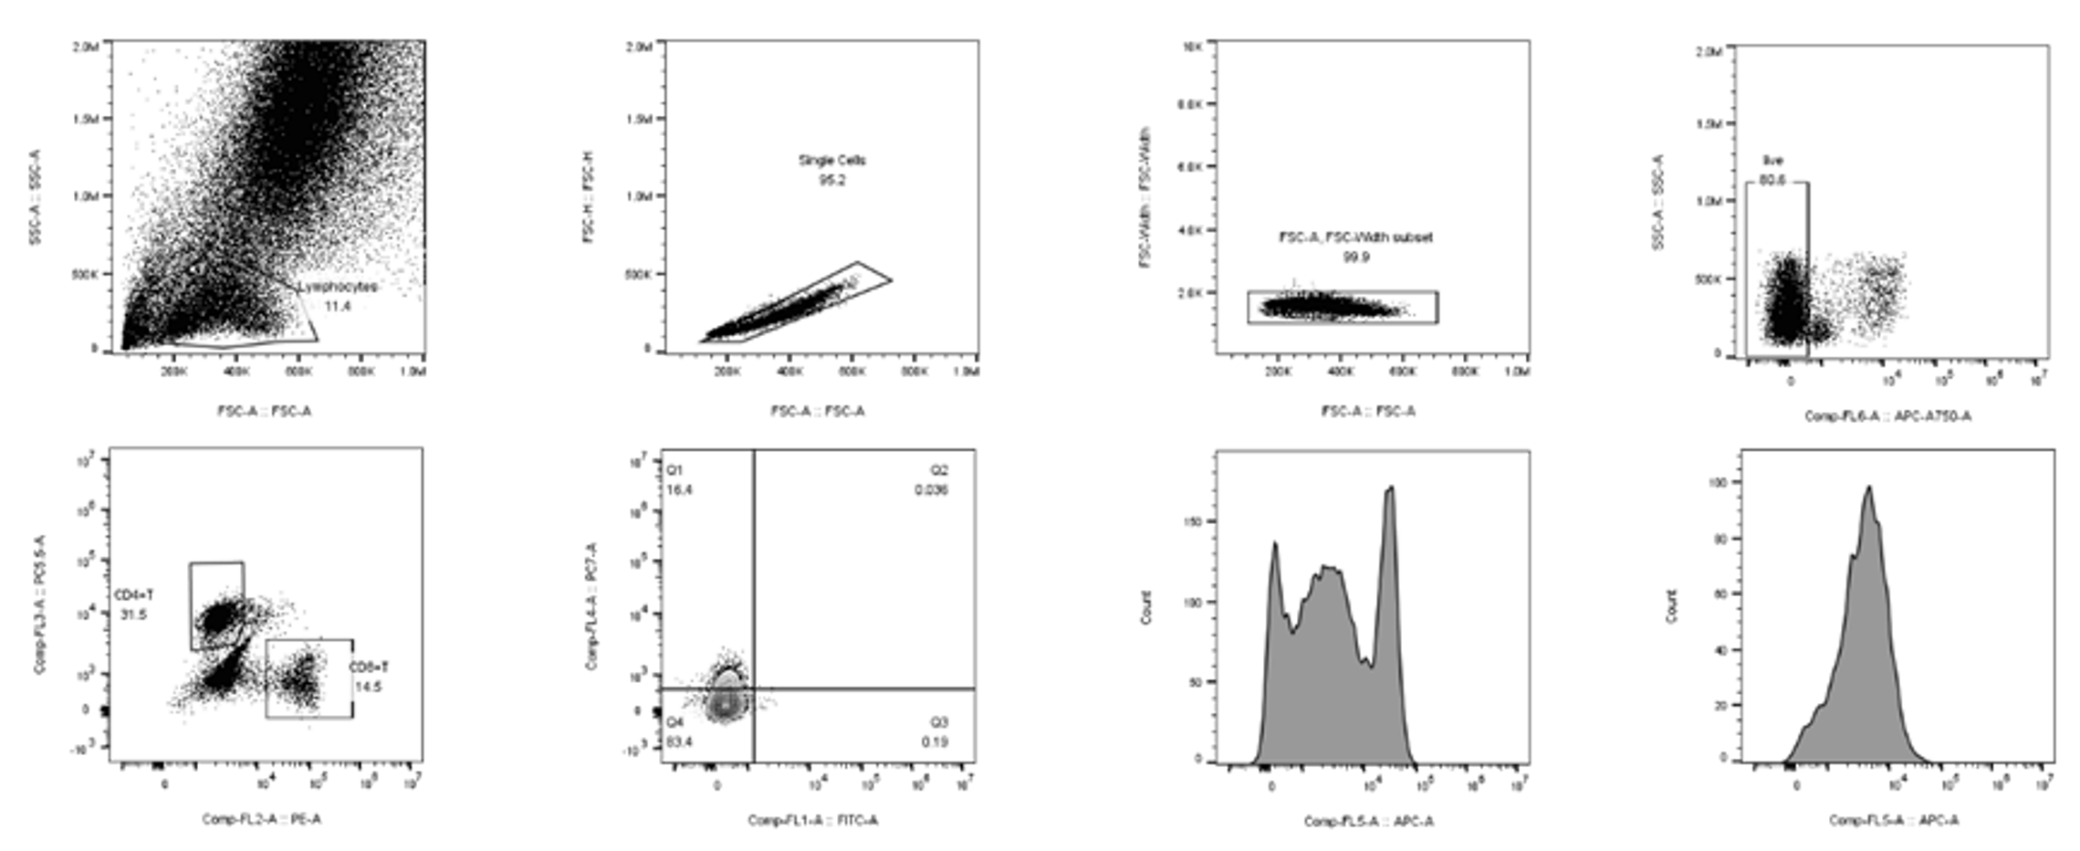


**Figure S2: Gating strategy and compensation controls for flow cytometric analysis of peripheral blood and tumor-infiltrating lymphocytes. This panel illustrates the sequential gating strategy used to identify and analyze T cell subsets.**

Top row, left to right: (1) Initial scatter plot (FSC-A vs SSC-A) to identify all cellular events; (2) Gating on single cells (FSC-H vs FSC-A) to exclude cell doublets; (3) FSC-W vs SSC-H gating to refine the lymphocyte population; (4) Viability gating (e.g., 7-AAD negative) to exclude dead cells.

Bottom row, left to right: (1) Gating on CD4⁺ and CD8⁺ T cell populations (CD4 vs CD8 staining); (2) Identification of effector regulatory T cells (eTreg) by gating on CD45RA⁻FOXP3⁺ cells within the CD4⁺ population; (3-4) Single-color compensation controls for CD4 and CD8, used to correct for spectral overlap between fluorochromes.This gating strategy was applied to both peripheral blood and tumor-infiltrating lymphocytes for subsequent analysis of PD-1 expression on CD8⁺ T cells and eTreg subsets.


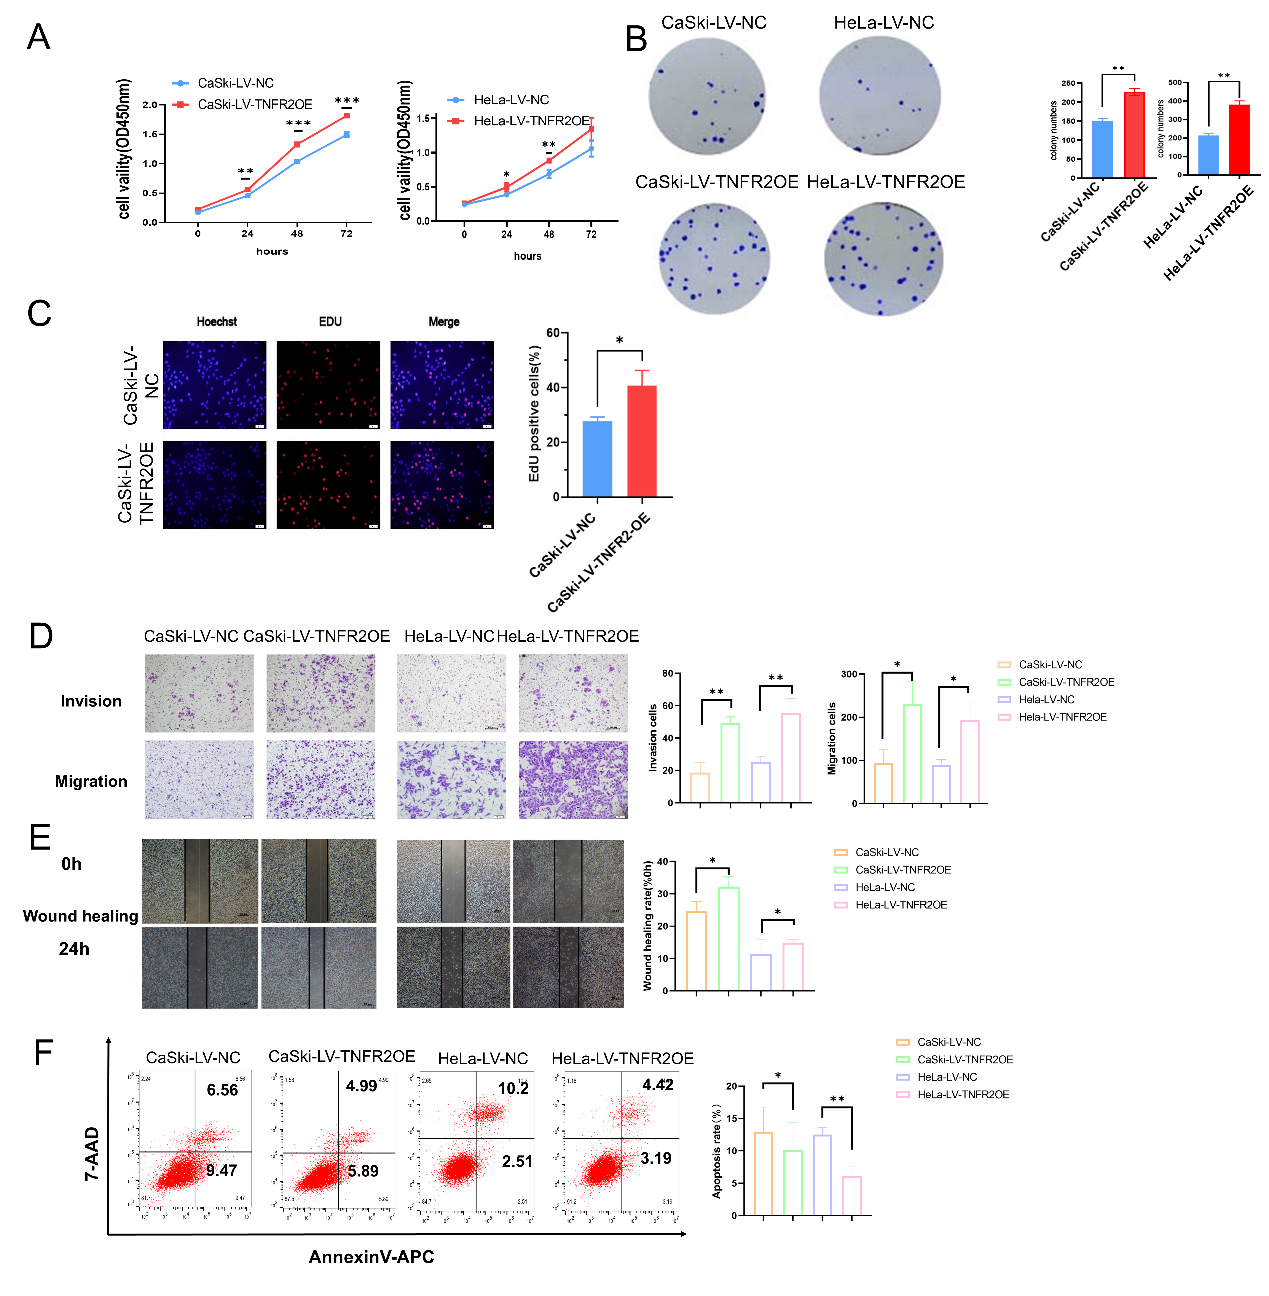


**Figure S3: TNFR2 overexpression enhances cervical cancer cell proliferation, migration, invasion and inhibits apoptosis in vitro.**

(A) CCK-8 assay showing cell viability of CaSki-LV-NC/CaSki-LV-TNFR2OE and HeLa-LV-NC/HeLa-LV-TNFR2OE cells over 96 hours. (B) Colony formation assay and quantification of colony numbers in CaSki-LV-NC/CaSki-LV-TNFR2OE and HeLa-LV-NC/HeLa-LV-TNFR2OE cells. (C)EdU staining and quantification of EdU-positive cells in CaSki-LV-NC and CaSki-LV-TNFR2OE cells. (D) Transwell migration and invasion assays and quantification of migrated/invasive cells in CaSki-LV-NC/CaSki-LV-TNFR2OE and HeLa-LV-NC/HeLa-LV-TNFR2OE cells. (E) Wound healing assay and quantification of wound healing rate in CaSki-LV-NC/CaSki-LV-TNFR2OE and HeLa-LV-NC/HeLa-LV-TNFR2OE cells. (F) Flow cytometry analysis of apoptosis and quantification of apoptosis rate in CaSki-LV-NC/CaSki-LV-TNFR2OE and HeLa-LV-NC/HeLa-LV-TNFR2OE cells.


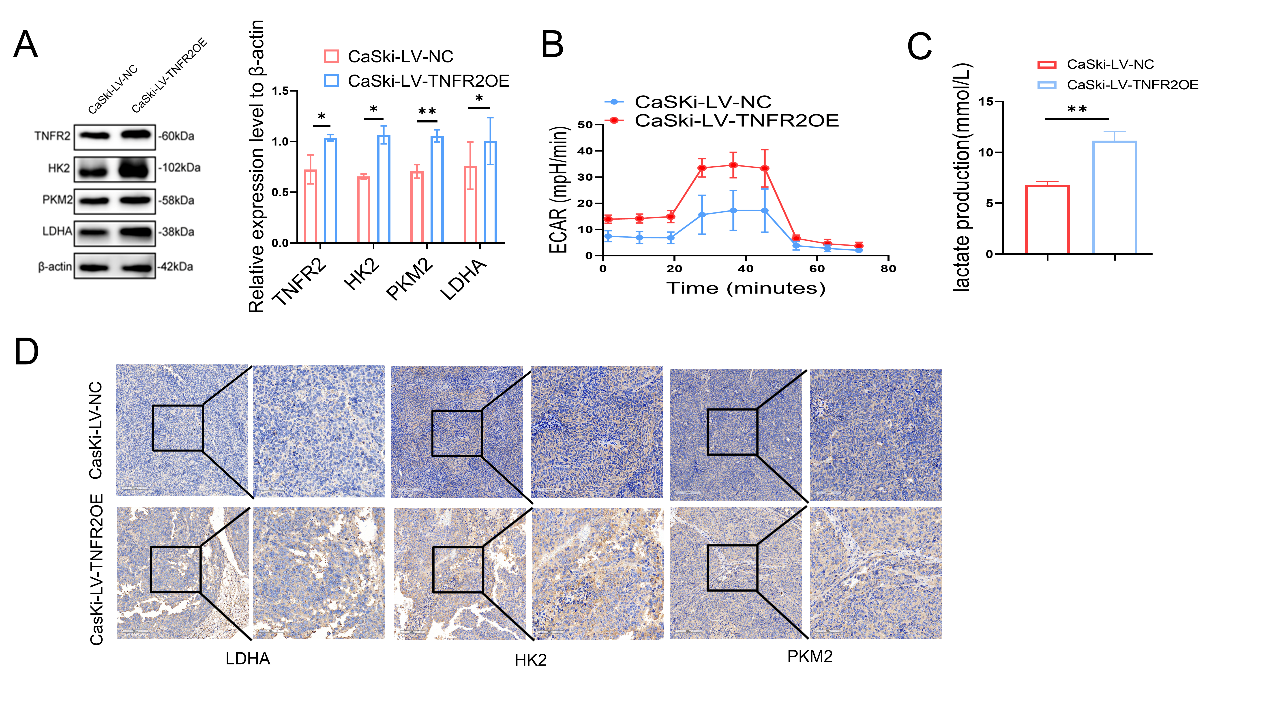


**Figure S4:TNFR2 overexpression enhances glycolysis in cervical cancer cells.**

(A) Western blot analysis of glycolytic key enzymes in CaSki-LV-NC and CaSki-LV-TNFR2OE cells, with quantification of relative expression. (B) Seahorse assay showing ECAR in CaSki-LV-NC and CaSki-LV-TNFR2OE cells. (C) Lactate production assay in CaSki-LV-NC and CaSki-LV-TNFR2OE cells (*p<0.05*). (D) IHC staining of LDHA, HK2, and PKM2 in tumor tissues from CaSki-LV-NC and CaSki-LV-TNFR2OE xenografts.
